# Supplementary material
Source: PubMed Central journal article supplement (PMC6231125)
Supplement: supp_RA118.004432_138779_1_supp_199923_psst10.pdf [file supp_RA118.004432_138779_1_supp_199923_psst10.pdf]

**A**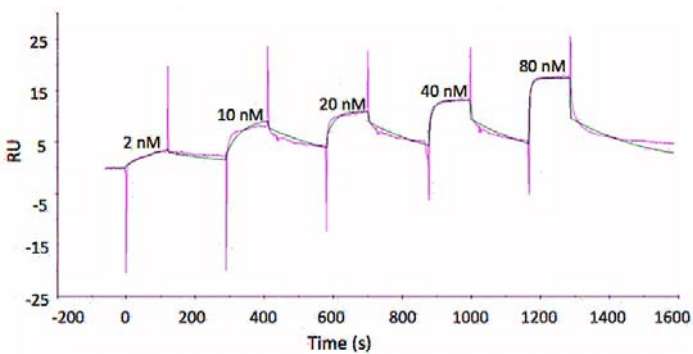**B**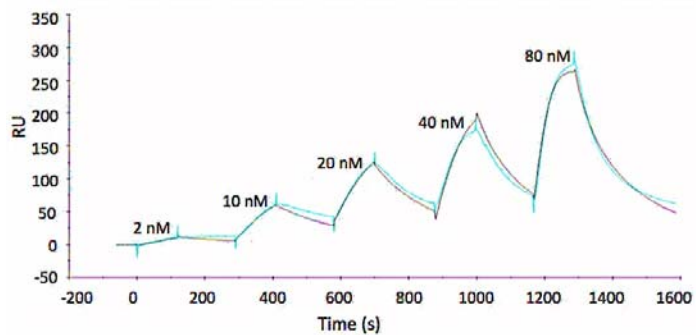**C**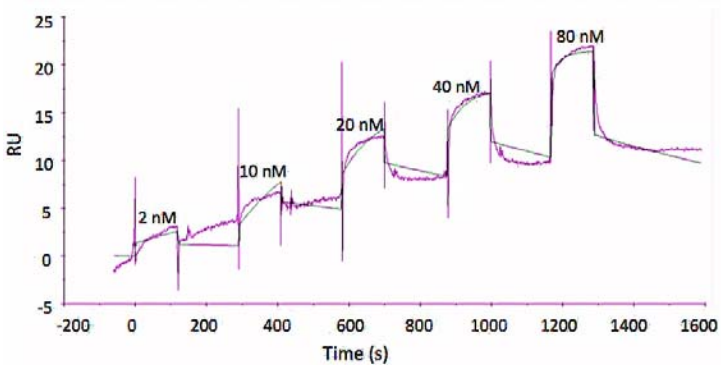**D**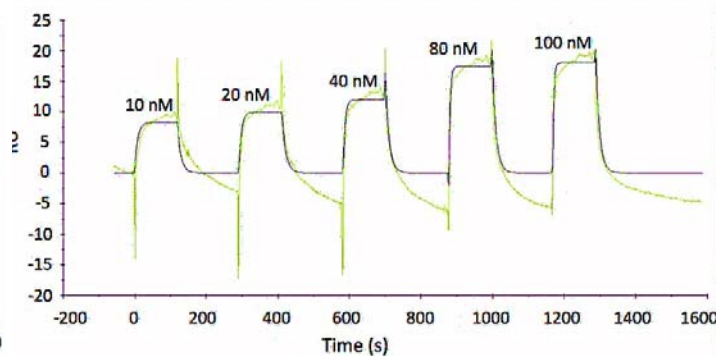**E**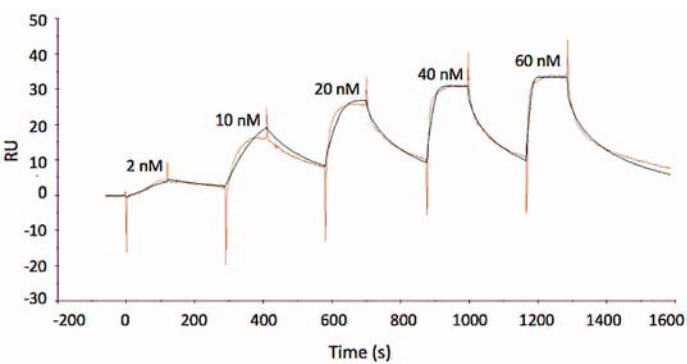**F**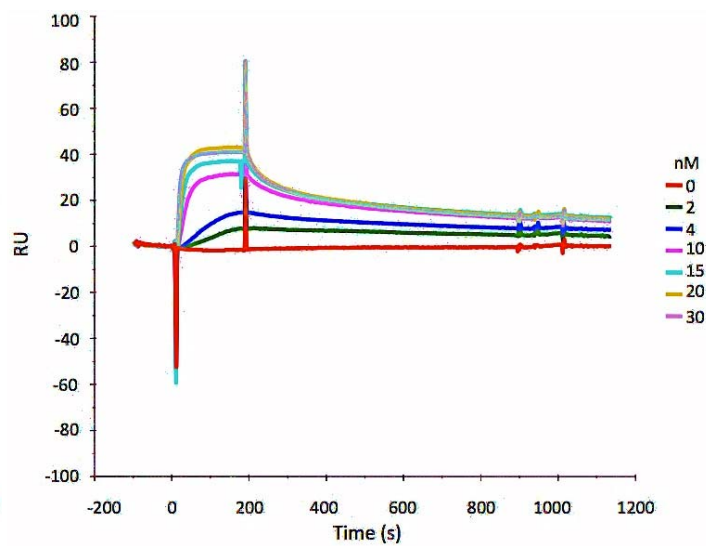

**Figure S1. SPR kinetics assay of chemokines to E163 and E163-1 to E163-5 proteins.**

Binding of chemokines indicated was tested on CM4 or CM5 chips coated with E163, and E163-1 to E163-5 proteins. The indicated concentrations of the analytes were injected over both flow cells at a rate of 10  $\mu$ l/min. The association phase (3 min) and the dissociation step (2 min) are shown. (A) mCxc12 $\beta$  binding to E163, (B) mCxc12 $\beta$  binding to E163-1, (C) mCxc12 $\beta$  binding to E163-2, (D) mCxc12 $\beta$  binding to E163-5, (E) mCcl21 binding to E163-2 and (F) mCcl21 binding to E163.

A

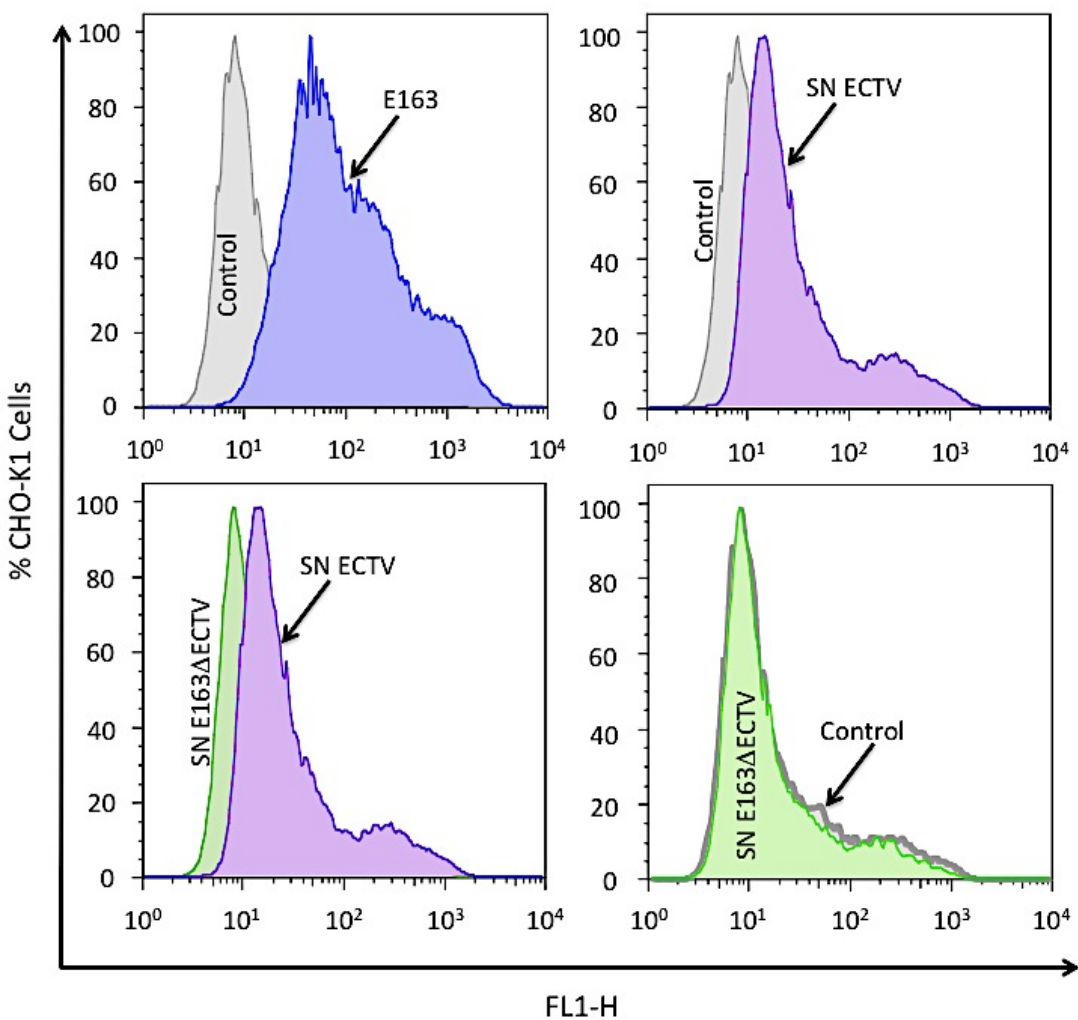

B

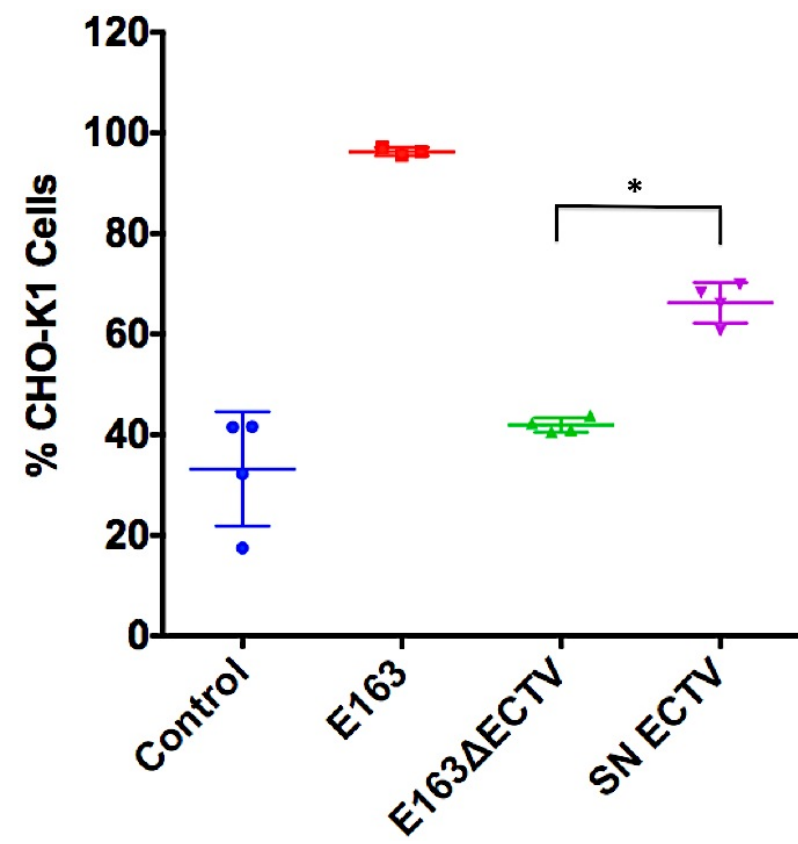

**Figure S2. Interaction of the E163 protein naturally secreted from infected cells with ECTV and ECTV $\Delta$ E163 with cellular surface.**

(A) Histograms show the binding of the control (grey), E163 protein (blue), supernatant from cells infected with ECTV (purple) and supernatant from cells infected with E163 $\Delta$ ECTV with CHO-K1 cells. (B) Scatter plots show the binding, mean (horizontal lines) and standard deviation (vertical lines), of the protein or supernatants to CHO-K1 cells in each case (n=4). The asterisk indicates significant differences ( $p < 0.05$ ) between supernatants from E163 $\Delta$ ECTV and ECTV. Data shown are representative of three experiments.
